# Supplementary material for: Sea Buckthorn Leaf Powders: The Impact of Cultivar and Drying Mode on Antioxidant, Phytochemical, and Chromatic Profile of Valuable Resource
Source: MDPI journal article supplement (doi:10.3390/molecules26164765), 2021-08-06
Supplement: s1 [file s1]

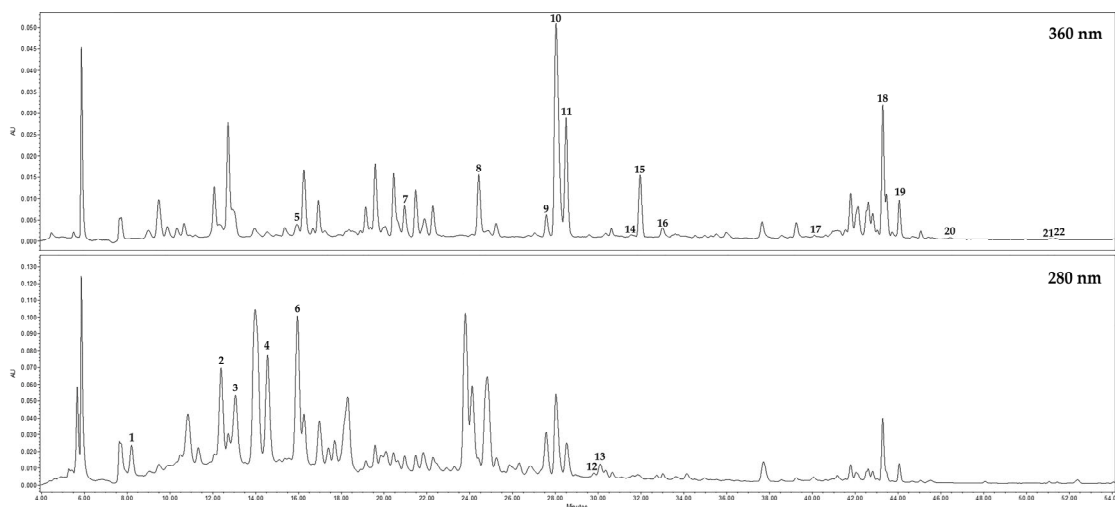

**Figure S1.** Representative HPLC-PDA chromatogram ( $\lambda = 360$  and  $280\text{nm}$ ) of *Hippophae rhamnoides* leaf powders, showing separation of phenolic compounds. Peak assignments: 1—gallic acid, 2—epigallocatechin, 3—protocatechuic acid, 4—procyanidin B3, 5—caftaric acid, 6—(+)-catechin, 7—caffeic acid, 8—rutin, 9—isoquercitrin, 10—ellagic acid, 11—isorhamnetin-3-rutinoside, 12—*p*-coumaric acid, 13—(–)-epicatechin gallate, 14—ferulic acid, 15—isorhamnetin-3-glucoside, 16—quercetin-3-*O*-(6''-acetylglucoside), 17—myricetin, 18—tiliroside, 19—resveratrol, 20—quercetin, 21—kaempferol, 22—isorhamnetin.

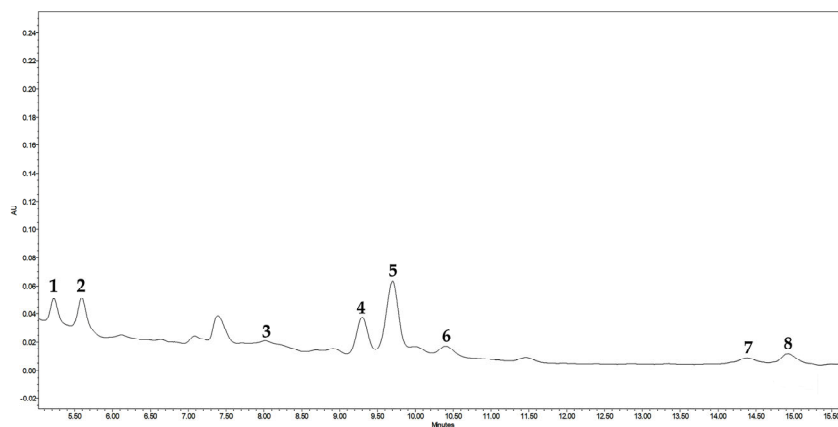

**Figure S2.** Representative HPLC-PDA chromatogram ( $\lambda = 205\text{ nm}$ ) of *Hippophae rhamnoides* leaf powders, showing separation of: 1—maslinic acid, 2—corosolic acid, 3—betulinic acid, 4—oleanolic acid, 5—ursolic acid, 6—betulin, 7—erythrodiol, 8—uvaol.

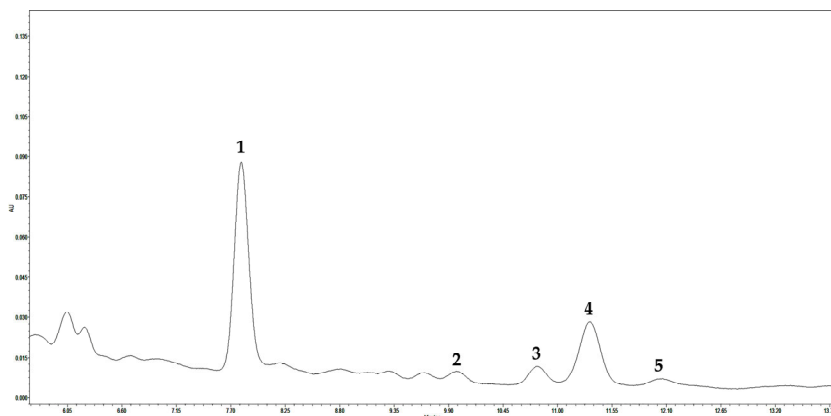

**Figure S3.** Representative HPLC-PDA chromatogram ( $\lambda = 205\text{ nm}$ ) of *Hippophae rhamnoides* leaf powders, showing separation of: 1—lupeol, 2— $\beta$ -amyrin, 3— $\beta$ -sitosterol, 4— $\alpha$ -amyrin, 5—friedelin.

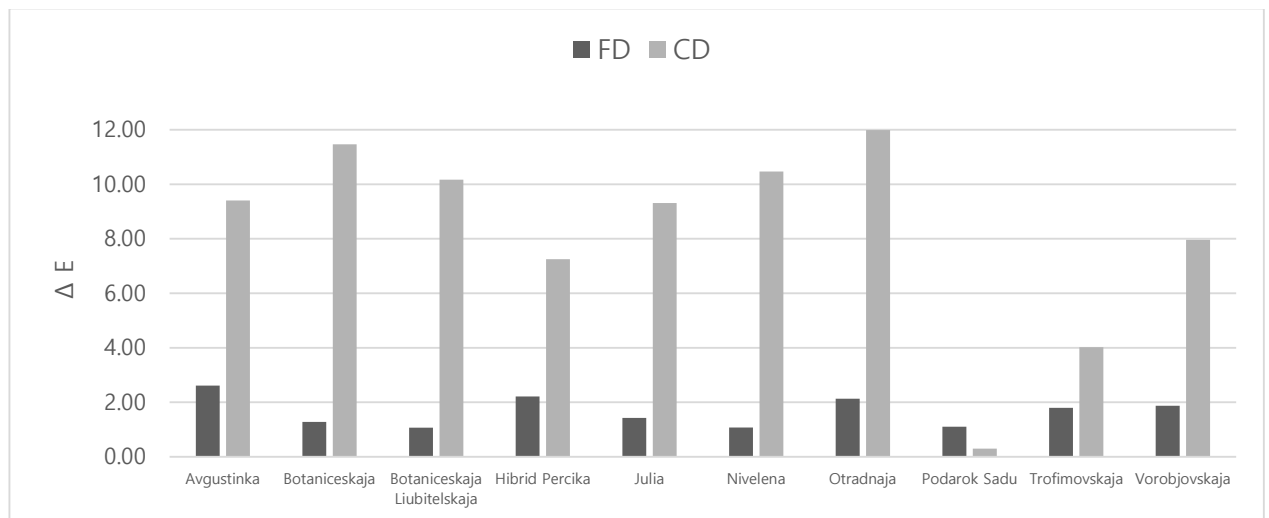

**Figure S4.** The difference between color of fresh *Hippophae rhamnoides* and dried ( $\Delta E$ ), using freeze-drying (FD) and convection-drying (CD).
